# Supplementary material
Source: publisher site journal article supplement (https://www.dovepress.com/article/216862)
Supplement: Supplementary file 1 [file get_supplementary_file.php]

Supplementary table 1 clinical characteristics of patients with GC including pathological stage, invasion, and metastasis state

| Parameter             | n= | NORAD<br>(Mean±SD) |
|-----------------------|----|--------------------|
| Age (years)           |    |                    |
| ≤ 60                  | 10 | 1.44±0.29          |
| > 60                  | 26 | 1.42±0.29          |
| Gender                |    |                    |
| Male                  | 21 | 1.40±0.24          |
| Female                | 15 | 1.47±0.35          |
| Tumor size (cm)       |    |                    |
| ≤ 5                   | 22 | 1.31±0.23          |
| > 5                   | 14 | 1.63±0.28          |
| Lymph node metastasis |    |                    |
| No                    | 13 | 1.23±0.18          |
| Yes                   | 23 | 1.55±0.28          |
| Grade                 |    |                    |
| I                     | 2  | 0.94±0.05          |
| II                    | 18 | 1.26±0.12          |
| III                   | 16 | 1.68±0.22          |
| Stage                 |    |                    |
| I-II                  | 12 | 1.16±0.12          |
| III-IV                | 24 | 1.57±0.25          |
